# Strain Differences in Bloodstream and Skin Infection MRSA isolated between 2019-2021 in a Single Health System

Katrina S. Hofstetter<sup>1</sup>, Natasia F. Jacko<sup>2</sup>, Margot J. Shumaker<sup>2</sup>, Brooke M. Talbot<sup>1</sup>, Robert A. Petit III<sup>1#</sup>, Timothy D. Read<sup>1</sup>, Michael Z. David<sup>2\*</sup>

<sup>1</sup> Division of Infectious Diseases, Department of Medicine, Emory University, Atlanta, Georgia, USA

<sup>2</sup> Division of Infectious Diseases, Department of Medicine, University of Pennsylvania, Philadelphia, Pennsylvania, USA

# Current address: Wyoming Public Health Laboratory, Cheyenne, Wyoming, USA

\* Corresponding author,  
Michael Z. David - [michdav@pennmedicine.upenn.edu](mailto:michdav@pennmedicine.upenn.edu)

Keywords: *Staphylococcus aureus*, whole genome sequencing, SSTI, bacteremia, clonal complex, CC5, CC8

KSH: [katrina.sierra.hofstetter@emory.edu](mailto:katrina.sierra.hofstetter@emory.edu); ORCID: 0000-0003-0389-2027

NFJ: [natasia.jacko@pennmedicine.upenn.edu](mailto:natasia.jacko@pennmedicine.upenn.edu); ORCID: 0000-0002-8295-7951

MJS: [margotshumaker@gmail.com](mailto:margotshumaker@gmail.com); ORCID 0000-0002-5993-7549

BMT: [brooke.talbot@emory.edu](mailto:brooke.talbot@emory.edu); ORCID [orcid.org/0000-0001-5246-7209](https://orcid.org/0000-0001-5246-7209)

RAP III: [rpetit@emory.edu](mailto:rpetit@emory.edu); ORCID; 0000-0002-1350-9426

TDR: [tread@emory.edu](mailto:tread@emory.edu); ORCID:0000-0001-8966-9680

MZD: [michdav@pennmedicine.upenn.edu](mailto:michdav@pennmedicine.upenn.edu) ORCID; 0000-0002-1926-7800

1 **Abstract:**

2 *S. aureus* is a common cause of skin and soft tissue infections (SSTIs) and has recently become  
3 the most common cause of bloodstream infections (BSIs), but whether the strains causing these  
4 two clinical syndromes overlap has not been studied adequately. USA300/500 (clonal complex  
5 [CC] 8-ST8) and USA100 (CC5-ST5) have dominated among methicillin-resistant *S. aureus*  
6 (MRSA) strains in the U.S. since the early 2000s. We compared the genomes of unselected  
7 MRSA isolates from 131 SSTIs with those from 145 BSIs at a single U.S. center in overlapping  
8 periods in 2018-2021. CC8 MRSA was more common among SSTIs and CC5 was more common  
9 among BSIs, consistent with prior literature. Based on clustering genomes with a threshold of  
10 15 single nucleotide polymorphisms (SNPs), we identified clusters limited to SSTI patients and  
11 separate clusters exclusively comprising BSI patients. However, we additionally identified 8  
12 outbreak clusters that included at least one SSTI and one BSI isolate. This suggests that virulent  
13 MRSA strains are transmitted from person-to-person locally in the healthcare setting and the  
14 community and that single lineages are often capable of causing both SSTIs and BSIs.

15

16 **Introduction**

17 *Staphylococcus aureus* asymptomatically colonizes the nares of 28-40% of the human  
18 population [1], [2]. *S. aureus* is a common cause of skin and soft tissue infections (SSTIs) [3], and  
19 has recently become the most common cause of bloodstream infections (BSIs) [4]. Nasal  
20 colonization of patients has been associated with an increased risk of both BSIs [5] and SSTIs  
21 [2], [3]. Colonization provides a reservoir from which *S. aureus* can access the bloodstream after  
22 a minor skin injury, trauma, surgery, or a viral infection [3], [4].

23 Community-associated (CA-) MRSA infections in the U.S., epidemiologically defined as  
24 those occurring in subjects with no recent healthcare exposures, have been most often  
25 reported in younger, healthy individuals [3], [6]. Healthcare-associated (HA-) MRSA infections,  
26 in contrast, are more likely to be diagnosed in older patients with comorbidities and are often  
27 invasive infections such as BSI or pneumonia [6]. Since at least 2004, the most often isolated  
28 MRSA strains in the US have belonged to clonal complex (CC)8 and CC5 [7]. USA300, which  
29 belongs to multilocus sequence type (ST) 8 (included in CC8), was initially associated with CA-  
30 MRSA infections, but since 2005 it has increasingly been recognized also as the cause of  
31 nosocomial infections [3], [6], [8]. USA300 has become the most common MRSA strain  
32 circulating in the US [9]. USA500 is a closely related CC8 strain type that is easily distinguished  
33 from USA300 by whole genome sequencing (WGS) [10], [11]. USA100 (usually ST5, which  
34 belongs to CC5) is most often a HA-MRSA strain. However, it has also been uncommonly  
35 isolated from epidemiologically defined CA-MRSA infections and from nasal carriage in subjects  
36 with no prior healthcare exposures [12]. Thus, there are no strain types that consistently  
37 distinguish between epidemiologically defined CA-MRSA and HA-MRSA infections [13].

38 Reports from the last 15 years indicate that the majority of MRSA SSTIs in the U.S. have  
39 their onset in the community and are caused by USA300 [3], [7], [8]. One study of strains  
40 reported in the published literature found that in 2002-2013, 62% of SSTIs were caused by  
41 USA300 and 19% by the second most common strain type, USA100 [8]. The prevalence of  
42 USA300 among BSI isolates may be increasing [14].

43 To understand the relationships between SSTI and BSI isolates, we performed WGS on  
44 SSTI and BSI MRSA strains from patients at two hospitals of the University of Pennsylvania from

45 2018-2020. We first compared the phylogenetic structure of MRSA isolates from SSTIs and BSIs.  
46 We then assessed whether any of these genomes were closely associated with one another,  
47 which would suggest recent transmission among study subjects. Among the SSTI isolates alone,  
48 three clusters were identified. We additionally identified eight clusters containing strains from  
49 both SSTI and BSI cases, suggesting epidemiological overlap and the spread of MRSA strains  
50 between patients with HA- and CA-MRSA infections within a single geographic area.

51

## 52 **Methods**

### 53 **Patient and isolate selection**

54 MRSA isolates were collected by the Hospital of the University of Pennsylvania (HUP)  
55 Clinical Microbiology Laboratory (CML) from routine clinical specimens obtained from  
56 outpatient clinics, emergency departments and inpatient units at HUP or the Penn Presbyterian  
57 Medical Center (PPMC). All MRSA isolates from SSTIs were biobanked in December 2018 -  
58 February 2021. After screening of the electronic medical record (EMR) to document that a  
59 MRSA isolate was from an SSTI, each source patient was contacted and offered enrollment in  
60 SEMAPHORE (Study of the Evolution of MRSA, Antibiotics, Persistence Having the Outcome of  
61 REcurrence), which is an NIH-funded study to determine risk factors for recurrent *S. aureus*  
62 infections during a 2-year period of follow-up. Approximately 28% of eligible subjects with SSTIs  
63 were enrolled prospectively in SEMAPHORE between December 2018 and February 2021 and  
64 were included in the present study. Separately, sequential patients with a MRSA BSI diagnosed  
65 in July 2018-August 2020 were included in a retrospective study (BREGOS, the MRSA  
66 Bacteremia Retrospective Epidemiologic and Genomic Outcomes Study [15]).

67 For both SSTI and BSI patients, collection of demographic data from the electronic  
68 medical record included age, race, sex, zip code of home residence, site of collection  
69 (emergency department, outpatient clinic, or inpatient), infection type, anatomic source of  
70 infection, and epidemiological classification (CA-, HA- or community-onset, healthcare-  
71 associated [HACO]). Infections in subjects who had a first positive culture obtained >48 hours  
72 after admission to a hospital were classified as HA-MRSA. If an infection occurred in a subject  
73 <48 hours after admission to a hospital or from an outpatient, but who had one or more  
74 specific healthcare exposures (hemodialysis, surgery, nursing home stay, hospitalization within  
75 the last year or presence of an indwelling central venous catheter at the time of diagnosis),  
76 subjects were classified as having a HACO-MRSA infection. Infections were classified as CA-  
77 MRSA if the patient had none of these healthcare exposures and was cultured as an outpatient  
78 or <48 hours after hospital admission. For BSI patients, the Pitt Bacteremia Score and in-  
79 hospital mortality were recorded. The study was approved by the University of Pennsylvania  
80 IRB.

81

## 82 **DNA sequencing**

83 Isolates from HUP CML were stored prospectively at -80C. To prepare DNA for  
84 sequencing, frozen cultures were streaked on blood agar plates and incubated overnight at  
85 37°C. Single isolates were passaged onto fresh blood agar plates before single colonies were  
86 isolated for sequencing. Isolates were sequenced at the Children's Hospital of Philadelphia  
87 Penn/CHOP Microbiome Center. Sequence libraries were prepared using the Illumina Nextera

88 kit and sequenced by Illumina Hi-seq. Sequences for the SSTI and BSI are available on NCBI  
89 Sequence Read Archive (PRJNA918392, PRJNA751847, respectively).

90

## 91 **Bioinformatic analysis**

92 The Bactopia pipeline was used to assemble fastq files, call MLST and SCCmec type,  
93 along with identifying variants [16]. CCs were assigned based on ST type and PubMLST. If a CC  
94 was not available for an ST the ST was used in place of the CC. All CC8 strains were classified as  
95 USA300 or USA500 based on the primer sequencing and the presence of PVL genes and  
96 arginine catabolic mobile element (ACME) [10]. To generate Maximum likelihood trees, core  
97 alignments were made using Parsnp (v 1.7.4) [17] and trees were created using IQ-Tree (v  
98 2.2.0.3) [18]. The GGTree package was used for visualization and figure generation [19]. Trees  
99 were rooted to GCF\_000144955.1\_ASM14495v1, and both a USA300 reference  
100 (GCF\_022226995.1\_ASM2222699v1) and USA500 reference  
101 (GCF\_016916765.1\_ASM1691676v1) were included. To identify outbreak clusters, we identified  
102 core genomes with fewer than 15 SNP differences, pairwise distances were calculated using  
103 Disty McMatrixface (<https://github.com/c2-d2/disty>). We used SCOARY2  
104 (<https://pubmed.ncbi.nlm.nih.gov/27887642/>) with default parameters to assess for an  
105 association of any *S. aureus* accessory gene with BSI or SSTI.

106

## 107 **Statistical Analysis**

108 Patient and isolate characteristics were compared for SSTI and BSI cohorts. The Chi-  
109 square test was used when testing for associations of demographic and clinical data with strain

110 types with categorical data, unless sample sizes were small (<5 in a cell), in which case the  
111 Fisher exact test was performed. Comparisons of continuous data were made using the  
112 Wilcoxon rank-sum test. All statistical analysis was performed using R v4.2.2 [20].

113

## 114 **Results**

115           During the study period, 131 subjects with SSTIs were enrolled, and 145 sequential  
116 subjects with a BSI were included in the BREGOS study [15]. SSTI and BSI patients did not differ  
117 significantly in distribution by age or race (**Table 1, Supplemental Figure 1**). However, SSTI  
118 patients were more likely to have CA-MRSA infections and less likely to have HA- or HACO-  
119 MRSA infections than BSI patients. SSTI patients were more likely to have been diagnosed with  
120 the infection as an outpatient (46% vs. 2%) or in the emergency department and sent home  
121 (27% vs. 3%) than BSI patients. BSI patients were nearly all diagnosed in the inpatient setting  
122 (95%) (**Table 1**). Abscesses were the most common type of SSTI (52%, n = 68), followed by  
123 surgical site infections (14%, n = 18) and infected wounds (12%, n = 16). Among BSI with a  
124 known source of infection, the most common sources were a skin site (19%) or a central venous  
125 catheter infection (14%) (**Table 2, Figure 1**). In-hospital mortality for BSI patients was 15%  
126 (22/145).

127

### 128 **Comparing strain types among SSTI and BSI MRSA Isolates**

129           SSTI isolates were assigned to 14 STs by genome-based MLST. CC8 and CC5 were the  
130 most abundant clonal complexes among the SSTI isolates, accounting for the vast majority of all  
131 MRSA strains, with CC8 being the most prevalent (102/131, 78%) and CC5 second most

132 (20/131, 15%) (**Table 1**). Among abscesses, CC8 strains were by far the most common (60/68,  
133 88%, p-value >0.01) (**Figure 1**). BSI isolates belonged to 5 CCs (CC8, CC5, CC72, CC78, and CC30),  
134 and 1 ST was not included in a CC (ST87). The BSI isolates were in 13 STs. As for SSTI isolates,  
135 the majority of BSI isolates were CC5 or CC8 (55/145, 38%, and 79/145, 54%, respectively),  
136 although the CC8 strains made up a significantly larger proportion of the SSTI than the BSI  
137 strains (p <0.1) (**Table 1, Figure 1**).

138 We compared the genomes of the 131 SSTI isolates to 145 BSI isolates [15]. All of the  
139 CC8 strains were subtyped into either USA300 (n=101 SSTI/n= 69 BSI) or USA500 [10] (n=1  
140 SSTI/n= 10 BSI). SSTI and BSI strains belonging to the same ST did not form separate subclades  
141 but instead were polyphyletic (**Figure 2**). The principal difference between the groups of strains  
142 was in the balance of the genotypes: CC8 were overrepresented in SSTI (102/131, 78%, p value  
143 >0.01) compared to CC5 (21/131, 16%) (**Figure 1, Table 1**). CC5, in contrast, were more often  
144 found as a cause of BSIs than of SSTIs (55/145, 38%).

145 Comparing the antimicrobial susceptibilities of BSI isolates to SSTI isolates, the patterns  
146 are quite similar overall. However, BSI isolates were less likely to be susceptible to clindamycin  
147 (59% vs. 73%), erythromycin (11% vs. 17%), and trimethoprim/sulfamethoxazole (93% vs.  
148 100%) (**Table 3**). These associations were confounded by the different strain backgrounds  
149 associated with SSTI/BSI and there was not a significant association between AMR genes and  
150 disease state when adjusting for phylogeny using the pangenome GWAS tool SCOARY2.

151

152 **Transmission clusters among SSTI and BSI strains**



153           While it has been reported that SSTI can serve as a reservoir for BSI, it is not known if  
154 MRSA causing BSIs and MRSA causing SSTIs, even within the same clonal complexes, are distinct  
155 from one another. We thus investigated, among isolated genomes from our study, how closely  
156 strains from different patients with BSIs and SSTIs were related. Several studies have indicated  
157 that a 15 SNP difference threshold can be used to cluster isolates into epidemiologically linked  
158 groups that shared the same common ancestor in the past few years [15], [21]–[25]. In our  
159 combined group of 276 isolates from SSTI and BSI, we identified 16 clusters containing between  
160 2 and 4 isolates using the 15 SNP threshold, representing 13% (35/276) of all isolates. The  
161 correlation of pairwise distances between the phylogenetic tree and the distance matrix was  
162 0.997 (**Supplemental Figure 2**). Three clusters contained only strains from SSTIs (all CC8) and in  
163 five clusters all strains were from BSIs (two CC8 and three CC5). Eight outbreak clusters  
164 contained at least one BSI isolate and one SSTI isolate, seven of which were CC8 and one was  
165 CC5 (**Figure 2 B,C, Table 4**). Comparisons of the electronic medical records revealed that one  
166 cluster that contained both a BSI and SSTI came from the same patient (cluster 15), while the  
167 remaining seven came from different patients. This result suggested frequent epidemiological  
168 overlap between patients with SSTIs in the community and BSI in hospitals.

## 169 **Discussion**

170           The results of this study highlight divergent trends in infections caused by the two most  
171 common *S. aureus* clonal complexes currently isolated in the USA. CC8 isolates were strongly  
172 associated with SSTI and CC5 with BSIs. CC8 isolates that are subtyped to USA300 were the  
173 most common strain type in our study population.

174           The USA300 MRSA strain likely emerged in the early 1970s and spread rapidly during the  
175 1990s and 2000s across North America to achieve its current predominant position among  
176 MRSA strain types [7], [26]. One study of 224 ST8 genomes suggested that the USA300 clone  
177 descended from an ST8 progenitor originating in central Europe in the 19th century, with an  
178 introduction to North America in the early 20th century, while gradually acquiring its typical  
179 genomic and virulence characteristics such as PVL, SCCmec type IVa, and the arginine catabolic  
180 mobile element (ACME) [27]. Another study of USA300 MRSA genomes suggested that the  
181 USA300 clone first emerged on the East Coast of the US, and perhaps in Pennsylvania [28].  
182 Although USA300 MRSA was originally identified as a “CA-MRSA strain”, it was soon also  
183 recognized as a nosocomial pathogen as early as 2005 [6], [8], [29], [30]. Indeed, USA300 has  
184 since become the leading cause of BSI in the US, which are usually classified as HA- or HACO-  
185 MRSA infections [4]. With this shift from the community to the healthcare setting, we  
186 previously demonstrated among 616 sequential MRSA isolates from the University of Chicago  
187 Medical Center in 2004-5 that there was already a poor correlation between the typical  
188 genotypic characteristics of “CA-MRSA” strain types, such as ST8, carrying SCCmec type IV, PVL  
189 gene carriage, or lack of a multidrug resistance phenotype with the CDC’s epidemiologic criteria  
190 for CA-MRSA infections [13].

191           In the current study, carried out in Philadelphia (750 miles from Chicago), and with  
192 isolates collected about 15 years later, the ST5 (USA100) and ST8 (USA300 or USA500) strains  
193 continue to dominate among MRSA isolates obtained from both blood and SSTIs. Many other  
194 U.S. and Canadian studies with isolates collected between 2003 and 2018 have shown similar  
195 results, with a generally increasing percent of BSIs and SSTIs caused by USA300/USA500 and a

196 decreasing percent caused by USA100 [14], [31]–[40]. In a cohort of 276 MRSA SSTI and BSI  
197 patients at a single U.S. institution in 2018-2021, CC5 and CC8 strains predominated. In fact,  
198 93% of all SSTI strains were either CC5 or CC8, and CC8 was significantly more common among  
199 SSTI than among BSI patients. Many epidemiologic characteristics of patients and their MRSA  
200 isolates were consistent with literature from the past 15 years, indicating only slowly shifting  
201 trends in relative strain prevalence during this period. Remarkably, we found that closely  
202 clonally related strains of MRSA caused both BSIs and SSTIs in different patients in our cohort,  
203 suggesting that the pathogenesis of invasive infections in very different human tissues may not  
204 require highly adapted strains. We do not yet know to what extent genetic differences between  
205 the clonal complexes (e.g., carriage of virulence genes such as arginine catabolic mobile  
206 element or PVL) play a role in the observed differences in sites of infection or if these  
207 differences.

208 We found in this study that abscesses are the most common type of SSTI, and they were  
209 significantly enriched among the infections caused by CC8 strains, an observation consistent  
210 with previous literature on CA-MRSA strains [41]. Also, in patients greater than 50 years of age  
211 who presented with an SSTI, we observed a higher prevalence of CC5 strains compared with  
212 younger patients. This trend could not be explained by differences in any specific infection type,  
213 although we did find that patients greater than 50 years old in our cohort were more likely than  
214 younger patients to have surgical site infections, and infected ulcers and wounds. The older  
215 population is likely to have had more healthcare-associated risk factors than those under 50,  
216 and CC5 may be more prevalent in the older cohort because CC5 strains tend to cause  
217 infections more often in hospital, rather than community, settings.

218           There have been few previous studies examining the genomes of MRSA infections from  
219 different anatomic sites at a single center. We identified potential MRSA transmission clusters  
220 using a conservative threshold of 15 or fewer SNPs. Three clusters were of only SSTI strains,  
221 suggesting small-scale outbreaks among the patients. There were also (five) clusters of only BSI  
222 strains, representing probable healthcare transmission, as reported by Talbot et al [15].  
223 Surprisingly, given that we showed BSI and SSTI were commonly caused by different *S. aureus*  
224 clones, we found that 50% of the clusters contained both disease types. This result suggested  
225 epidemiologic linkage between BSI and SSTI may be more frequent than previously realized.  
226 There is literature that discusses potential BSI reservoirs being concurrent SSTI [14] and  
227 colonization of the nares [5]. A prior SSTI within the last year also increased the risk of a BSI  
228 [14]. Thus, it is possible that some BSI patients in our study became bacteremic after a MRSA  
229 SSTI; however, only a small number of patients had a known SSTI as a source of BSI in our  
230 cohort.

231           Limitations of our study include the relatively small size of the cohorts examined and the  
232 lack of epidemiologic data about potential interactions among subjects. Also, the study was  
233 performed only at a single center and thus may not be generalizable.

234           Our work highlights the importance of considering strain background in future studies of  
235 *S. aureus* to understand the relative roles of strain and patient characteristics in determining  
236 sites of infection.

237

## 238 **Conflicts of interest**

239 The authors report no conflicts of interest.

## 240 Funding

241 The authors were supported by the National Institute of Health (NIH) (grant number RO1  
242 AI139188)

## 243 References

- 244
- 245 [1] Corey P. Parlet, M. M. Brown, and A. R. Horswill, "Commensal Staphylococci Influence  
246 Staphylococcus aureus Skin Colonization and Disease," *Physiol. Behav.*, vol. 176, no. 3,  
247 pp. 139–148, 2017, doi: 10.1016/j.tim.2019.01.008.Commensal.
- 248 [2] J. Kluytmans, A. van Belkum, and H. Verbrugh, "Nasal carriage of Staphylococcus aureus:  
249 epidemiology, underlying mechanisms, and associated risks," *Clin. Microbiol. Rev.*, vol.  
250 10, no. 3, pp. 505–520, 1997, doi: 10.1128/cmr.10.3.505.
- 251 [3] S. D. Kobayashi, N. Malachowa, and F. R. Deleo, "Pathogenesis of Staphylococcus aureus  
252 abscesses," *Am. J. Pathol.*, vol. 185, no. 6, pp. 1518–1527, 2015, doi:  
253 10.1016/j.ajpath.2014.11.030.
- 254 [4] E. J. M. Raineri, D. Altulea, and J. M. van Dijk, "Staphylococcal trafficking and infection—  
255 from 'nose to gut' and back," *FEMS Microbiol. Rev.*, no. March, pp. 1–22, 2021, doi:  
256 10.1093/femsre/fuab041.
- 257 [5] H. F. L. Wertheim *et al.*, "Risk and outcome of nosocomial Staphylococcus aureus  
258 bacteraemia in nasal carriers versus non-carriers," *Lancet*, vol. 364, no. 9435, pp. 703–  
259 705, 2004, doi: 10.1016/S0140-6736(04)16897-9.
- 260 [6] M. Z. David and R. S. Daum, "Community-associated methicillin-resistant Staphylococcus  
261 aureus: Epidemiology and clinical consequences of an emerging epidemic," *Clin.  
262 Microbiol. Rev.*, vol. 23, no. 3, pp. 616–687, 2010, doi: 10.1128/CMR.00081-09.
- 263 [7] P. J. Planet *et al.*, "Architecture of a Species: Phylogenomics of Staphylococcus aureus,"  
264 *Trends Microbiol.*, vol. 25, no. 2, pp. 153–166, 2017, doi: 10.1016/j.tim.2016.09.009.
- 265 [8] M. Carrel, E. N. Perencevich, and M. Z. David, "USA300 methicillin-resistant  
266 Staphylococcus aureus, United States, 2000–2013," *Emerg. Infect. Dis.*, vol. 21, no. 11,  
267 pp. 1973–1980, 2015, doi: 10.3201/eid2111.150452.
- 268 [9] D. J. Diekema *et al.*, "Continued Emergence of USA300 Methicillin-Resistant  
269 Staphylococcus aureus in the United States: Results from a Nationwide Surveillance  
270 Study," *Infect. Control Hosp. Epidemiol.*, vol. 35, no. 3, pp. 285–292, Mar. 2014, doi:  
271 10.1086/675283.
- 272 [10] J. R. Bowers *et al.*, "Improved Subtyping of Staphylococcus aureus Clonal Complex 8  
273 Strains Based on Whole-Genome Phylogenetic Analysis," *mSphere*, vol. 3, no. 3, pp. 1–15,  
274 2018, doi: 10.1128/msphere.00464-17.
- 275 [11] M. B. Frisch *et al.*, "Invasive Methicillin-Resistant," 2018.
- 276 [12] J. C. Roberts, "Community-associated methicillin-resistant staphylococcus aureus  
277 epidemic clone USA100; more than a nosocomial pathogen," *Springerplus*, vol. 2, no. 1,  
278 pp. 1–3, 2013, doi: 10.1186/2193-1801-2-133.
- 279 [13] M. Z. David *et al.*, "What is community-associated methicillin-resistant Staphylococcus

- 280 aureus?," *J. Infect. Dis.*, vol. 197, no. 9, pp. 1235–1243, 2008, doi: 10.1086/533502.
- 281 [14] P. Tattevin *et al.*, "Concurrent epidemics of skin and soft tissue infection and  
282 bloodstream infection due to community-associated methicillin-resistant staphylococcus  
283 aureus," *Clin. Infect. Dis.*, vol. 55, no. 6, pp. 781–788, 2012, doi: 10.1093/cid/cis527.
- 284 [15] B. M. Talbot *et al.*, "Unsuspected clonal spread of Methicillin-resistant Staphylococcus  
285 aureus causing bloodstream infections in hospitalized adults detected using whole  
286 genome sequencing," *Clin Infect Dis.* 2022 Dec 19;75(12):2104-2112. doi:  
287 10.1093/cid/ciac339. PMID: 35510945; PMCID: PMC10200302..
- 288 [16] R. A. Petit and T. D. Read, "Bactopia: A flexible pipeline for complete analysis of bacterial  
289 genomes," *mSystems*, vol. 5, no. 4, pp. 1–18, 2020, doi: 10.1101/2020.02.28.969394.
- 290 [17] T. J. Treangen, B. D. Ondov, S. Koren, and A. M. Phillippy, "The harvest suite for rapid  
291 core-genome alignment and visualization of thousands of intraspecific microbial  
292 genomes," *Genome Biol.*, vol. 15, no. 11, pp. 1–15, 2014, doi: 10.1186/s13059-014-0524-  
293 x.
- 294 [18] L. T. Nguyen, H. A. Schmidt, A. Von Haeseler, and B. Q. Minh, "IQ-TREE: A fast and  
295 effective stochastic algorithm for estimating maximum-likelihood phylogenies," *Mol. Biol.*  
296 *Evol.*, vol. 32, no. 1, pp. 268–274, 2015, doi: 10.1093/molbev/msu300.
- 297 [19] G. Yu, D. K. Smith, H. Zhu, Y. Guan, and T. T. Y. Lam, "Ggtree: an R Package for  
298 Visualization and Annotation of Phylogenetic Trees With Their Covariates and Other  
299 Associated Data," *Methods Ecol. Evol.*, vol. 8, no. 1, pp. 28–36, 2017, doi: 10.1111/2041-  
300 210X.12628.
- 301 [20] R. C. Team, "R: A language and environment for statistical computing. R Foundation for  
302 Statistical Computing," 2022, [Online]. Available: <https://www.r-project.org/>.
- 303 [21] T. Azarian *et al.*, "Genomic epidemiology of Methicillin-resistant Staphylococcus aureus  
304 in a neonatal intensive care unit," *PLoS One*, vol. 11, no. 10, pp. 1–20, 2016, doi:  
305 10.1371/journal.pone.0164397.
- 306 [22] F. Coll *et al.*, "Definition of a genetic relatedness cutoff to exclude recent transmission of  
307 methicillin-resistant Staphylococcus aureus: a genomic epidemiology analysis," *The Lancet*  
308 *Microbe*, vol. 1, no. 8, pp. e328–e335, 2020, doi: 10.1016/S2666-5247(20)30149-X.
- 309 [23] D. W. Eyre *et al.*, "A pilot study of rapid benchtop sequencing of Staphylococcus aureus  
310 and Clostridium difficile for outbreak detection and surveillance," *BMJ Open*, vol. 2, no. 3,  
311 pp. 1–9, 2012, doi: 10.1136/bmjopen-2012-001124.
- 312 [24] J. A. Lees, M. Kendall, J. Parkhill, C. Colijn, S. D. Bentley, and S. R. Harris, "Evaluation of  
313 phylogenetic reconstruction methods using bacterial whole genomes: a simulation based  
314 study," *Wellcome Open Res.*, vol. 3, no. May, p. 33, 2018, doi:  
315 10.12688/wellcomeopenres.14265.1.
- 316 [25] J. Stimson, J. Gardy, B. Mathema, V. Crudu, T. Cohen, and C. Colijn, "Beyond the SNP  
317 Threshold: Identifying Outbreak Clusters Using Inferred Transmissions," *Mol. Biol. Evol.*,  
318 vol. 36, no. 3, pp. 587–603, 2019, doi: 10.1093/molbev/msy242.
- 319 [26] C. M. Bianco *et al.*, "Pre-epidemic evolution of the MRSA USA300 clade and a molecular  
320 key for classification," *Front. Cell. Infect. Microbiol.*, vol. 13, no. January, pp. 1–13, 2023,  
321 doi: 10.3389/fcimb.2023.1081070.
- 322 [27] L. Strauß *et al.*, "Origin, evolution, and global transmission of community-acquired  
323 Staphylococcus aureus ST8," *Proc. Natl. Acad. Sci. U. S. A.*, vol. 114, no. 49, pp. E10596–

- 324 E10604, 2017, doi: 10.1073/pnas.1702472114.
- 325 [28] L. Challagundla *et al.*, “crossm Epidemic Methicillin-Resistant Staphylococcus aureus,”  
326 vol. 9, no. 1, pp. 1–15, 2018.
- 327 [29] K. Kobayashi, “Gradual activation of the response regulator DegU controls serial  
328 expression of genes for flagellum formation and biofilm formation in *Bacillus subtilis*,”  
329 *Mol. Microbiol.*, vol. 66, no. 2, pp. 395–409, 2007, doi: 10.1111/j.1365-  
330 2958.2007.05923.x.
- 331 [30] C. L. Moore *et al.*, “Comparative evaluation of epidemiology and outcomes of methicillin-  
332 resistant Staphylococcus aureus (MRSA) USA300 infections causing community- and  
333 healthcare-associated infections,” *Int. J. Antimicrob. Agents*, vol. 34, no. 2, pp. 148–155,  
334 2009, doi: 10.1016/j.ijantimicag.2009.03.004.
- 335 [31] J. T. Smith, E. M. Eckhardt, N. B. Hansel, T. R. Eliato, I. W. Martin, and C. P. Andam,  
336 “Genomic epidemiology of methicillin-resistant and -susceptible Staphylococcus aureus  
337 from bloodstream infections,” *BMC Infect. Dis.*, vol. 21, no. 1, pp. 1–14, 2021, doi:  
338 10.1186/s12879-021-06293-3.
- 339 [32] I. A. Tickler, R. V. Goering, J. R. Mediavilla, B. N. Kreiswirth, and F. C. Tenover, “Continued  
340 expansion of USA300-like methicillin-resistant Staphylococcus aureus (MRSA) among  
341 hospitalized patients in the United States,” *Diagn. Microbiol. Infect. Dis.*, vol. 88, no. 4,  
342 pp. 342–347, 2017, doi: 10.1016/j.diagmicrobio.2017.04.016.
- 343 [33] S. N. Thiede *et al.*, “Genomic Epidemiology Suggests Community Origins of Healthcare-  
344 Associated USA300 Methicillin-Resistant Staphylococcus aureus,” *J. Infect. Dis.*, vol. 226,  
345 no. 1, pp. 157–166, 2022, doi: 10.1093/infdis/jiac056.
- 346 [34] B. W. Jenkins TC, McCollister BD, Sharma R, McFann KK, Madinger NE, Barron M,  
347 Bessesen M, Price CS, “Epidemiology of healthcare-associated bloodstream infection  
348 caused by USA300 strains of methicillin-resistant Staphylococcus aureus in 3 affiliated  
349 hospitals,” *Infect Control Hosp Epidemiol.*, vol. 30, no. 3,  
350 pp. 233–41, 2009, doi: 10.1086/595963.
- 351 [35] M. Pardos De La Gandara *et al.*, “MRSA causing infections in hospitals in Greater  
352 Metropolitan New York: Major shift in the dominant clonal type between 1996 and  
353 2014,” *PLoS One*, vol. 11, no. 6, pp. 1–13, 2016, doi: 10.1371/journal.pone.0156924.
- 354 [36] M. Sherwood, J., Park, M., Robben, P., Whitman, T., & Ellis, “USA300 Methicillin-Resistant  
355 Staphylococcus aureus Emerging as a Cause of Bloodstream Infections at Military  
356 Medical Centers,” *Infect. Control Hosp. Epidemiol.*, vol. 34, no. 4, pp. 393–399, 2013, doi:  
357 10.1086/669866.
- 358 [37] M. Z. David *et al.*, “Staphylococcus aureus bacteremia at 5 US Academic Medical Centers,  
359 2008-2011: Significant geographic variation in community-onset infections,” *Clin. Infect.  
360 Dis.*, vol. 59, no. 6, pp. 798–807, 2014, doi: 10.1093/cid/ciu410.
- 361 [38] L. O. Hudson *et al.*, “Diversity of Methicillin-Resistant Staphylococcus aureus (MRSA)  
362 Strains Isolated from Inpatients of 30 Hospitals in Orange County, California,” *PLoS One*,  
363 vol. 8, no. 4, pp. 1–8, 2013, doi: 10.1371/journal.pone.0062117.
- 364 [39] D. A. Talan *et al.*, “Comparison of staphylococcus aureus from skin and soft-tissue  
365 infections in us emergency Department patients, 2004 and 2008,” *Clin. Infect. Dis.*, vol.  
366 53, no. 2, pp. 144–149, 2011, doi: 10.1093/cid/cir308.
- 367 [40] K. A. Nichol *et al.*, “Characterization of MRSA in Canada from 2007 to 2016,” *J.*

368 *Antimicrob. Chemother.*, vol. 74, pp. IV55–IV63, 2019, doi: 10.1093/jac/dkz288.  
369 [41] S. E. Crawford, M. Z. David, D. Glikman, K. J. King, S. Boyle-Vavra, and R. S. Daum,  
370 “Clinical importance of purulence in methicillin-resistant *Staphylococcus aureus* skin and  
371 soft tissue infections,” *J. Am. Board Fam. Med.*, vol. 22, no. 6, pp. 647–654, 2009, doi:  
372 10.3122/jabfm.2009.06.090025.  
373

## 374 **Tables**

375 Table 1. Demographic and clinical characteristics of subjects with MRSA infections and clonal  
376 complexes of the causative MRSA isolates, comparing bacteremia (BSI) cases to skin and soft  
377 tissue infections (SSTIs).

378



| Category                     | SSTI n=131 (%) | BSI n=145 (%) | p-value   |
|------------------------------|----------------|---------------|-----------|
| <b>Race</b>                  |                |               |           |
|                              |                |               | p > 0.05  |
| White                        | 81 (62)        | 78 (54)       |           |
| Black                        | 43 (33)        | 58 (40)       |           |
| Asian                        | 2 (2)          | 2 (1)         |           |
| Other                        | 5 (4)          | 7 (5)         |           |
| <b>Gender</b>                |                |               |           |
|                              |                |               | p > 0.05  |
| Female                       | 62 (47)        | 70 (48)       |           |
| Male                         | 69 (53)        | 75 (52)       |           |
| <b>Epidemiologic Type</b>    |                |               |           |
|                              |                |               | p < 0.001 |
| HA                           | 5 (5)          | 34 (23)       |           |
| CA                           | 64 (49)        | 17 (12)       |           |
| HACO                         | 62 (47)        | 94 (65)       |           |
| <b>Site of Diagnosis</b>     |                |               |           |
|                              |                |               | p < 0.001 |
| Emergency Department patient | 35 (27)        | 4 (3)         |           |
| Inpatient                    | 36 (27)        | 138 (95)      |           |
| Outpatient                   | 60 (46)        | 3 (2)         |           |
| <b>Age (years)</b>           |                |               |           |
|                              |                |               | p > 0.05  |
| <50                          | 52 (40)        | 57 (40)       |           |
| >50                          | 79 (60)        | 86 (60)       |           |
| <b>Clonal complex or ST</b>  |                |               |           |
|                              |                |               | p < 0.001 |
| CC8                          | 102 (78)       | 79 (55)       |           |
| CC5                          | 20 (15)        | 55 (39)       |           |
| CC1                          | 1 (<1)         | 0             |           |
| CC6                          | 1 (<1)         | 0             |           |
| CC22                         | 2 (1)          | 0             |           |
| CC30                         | 1 (<1)         | 2 (1)         |           |
| CC45                         | 1 (<1)         | 0             |           |
| CC59                         | 1 (<1)         | 0             |           |
| CC71                         | 1 (<1)         | 0             |           |
| CC72                         | 0              | 6 (4)         |           |
| CC78                         | 0              | 2 (1)         |           |
| ST87                         | 0              | 1 (<1)        |           |

380 Table 2. Types of skin and soft tissue infections (SSTIs) and sources of bacteremia (BSI) in this  
381 study

| <b>Type of SSTI n=131 (%)</b>     |          |
|-----------------------------------|----------|
| Abscess                           | 68 (52%) |
| Surgical Site Infection           | 18 (14%) |
| Infected Wounds                   | 16 (12%) |
| Cellulitis                        | 15 (11%) |
| Folliculitis                      | 3 (2%)   |
| Impetigo                          | 3 (2%)   |
| Pustule                           | 3 (2%)   |
| Otitis Externa                    | 1 (<1%)  |
| Paronychia                        | 1 (<1%)  |
| Cyst                              | 1 (<1%)  |
| Pyomyositis                       | 1 (<1%)  |
| Tenosynovitis                     | 1 (<1%)  |
| <b>Type of BSI n=145 (%)</b>      |          |
| Skin site                         | 27 (19%) |
| Central venous catheter infection | 20 (14%) |
| Surgical site                     | 7 (5%)   |
| Device infection                  | 5 (3%)   |
| Arteriovenous Graft               | 4 (3%)   |
| Respiratory source                | 3 (2%)   |
| Urinary source                    | 3 (2%)   |
| Other                             | 5 (3%)   |
| Unknown                           | 71 (49%) |

382

383

384

385

386 Table 3. Susceptibility of MRSA to antimicrobial agents, comparing skin and soft tissue infection  
 387 (SSTI) isolates to bacteremia (BSI) isolates

| Drug name                     | SSTI n=131 (%) |             | BSI n=145 (%) |             |
|-------------------------------|----------------|-------------|---------------|-------------|
|                               | Number tested  | Susceptible | Number test   | Susceptible |
| Ampicillin                    | 130            | 0           | 145           | 0           |
| Cefazolin                     | 130            | 0           | 145           | 0           |
| Penicillin                    | 131            | 0           | 145           | 0           |
| Oxacillin                     | 131            | 0           | 145           | 0           |
| Gentamicin                    | 131            | 126 (96)    | 144           | 142 (99)    |
| Ciprofloxacin                 | 131            | 38 (29)     | 144           | 45 (31)     |
| Levofloxacin                  | 131            | 38 (29)     | 145           | 45 (31)     |
| Moxifloxacin                  | 131            | 39 (30)     | 144           | 46 (32)     |
| Erythromycin                  | 131            | 22 (17)     | 145           | 16 (11)     |
| Clindamycin                   | 131            | 95 (73)     | 145           | 86 (59)     |
| Quinupristin-Dalfopristin     | 130            | 130 (100)   | 144           | 144 (100)   |
| Linezolid                     | 130            | 130 (100)   | 144           | 144 (100)   |
| Vancomycin                    | 131            | 131 (100)   | 145           | 145 (100)   |
| Tetracycline                  | 131            | 120 (92)    | 145           | 125 (86)    |
| Tigecycline                   | 131            | 128 (98)    | 145           | 139 (96)    |
| Nitrofurantoin                | 131            | 129 (98)    | 144           | 144 (100)   |
| Rifampicin                    | 131            | 130 (99)    | 145           | 141 (97)    |
| Trimethoprim/Sulfamethoxazole | 131            | 131 (100)   | 145           | 135 (93)    |
| Daptomycin                    | 0              | 0           | 130           | 130 (100)   |
| Ceftaroline                   | 0              | 0           | 5             | 5 (100)     |
| Cefoxitin                     | 130            | 0 (0)       | 144           | 2 (1)       |

388  
 389  
 390  
 391  
 392  
 393  
 394  
 395

396 Table 4. Demographic and strain data for all MRSA outbreak clusters.

| Subject ID* | SSTI clusters | SSTI BSI clusters | BSI clusters | Sample Type | ST  | CC  | USA300/500 | Source of BSI                     | Type of SSTI    | Race  | Sex    | Age   |
|-------------|---------------|-------------------|--------------|-------------|-----|-----|------------|-----------------------------------|-----------------|-------|--------|-------|
| S0111       | 3             |                   |              | SSTI        | 8   | CC8 | USA300     | NA                                | Abscess         | Other | Male   | 25-30 |
| S0125       | 3             |                   |              | SSTI        | 8   | CC8 | USA300     | NA                                | Infected Wounds | White | Male   | 55-60 |
| S0004       | 7             |                   |              | SSTI        | 8   | CC8 | USA300     | NA                                | Abscess         | White | Male   | 35-40 |
| S0112       | 7             |                   |              | SSTI        | 8   | CC8 | USA300     | NA                                | Otitis Externa  | Black | Female | 50-55 |
| S0014       | 8             |                   |              | SSTI        | 8   | CC8 | USA300     | NA                                | Cellulitis      | White | Male   | 65-70 |
| S0118       | 8             |                   |              | SSTI        | 8   | CC8 | USA300     | NA                                | Infected Wounds | Black | Male   | 70-75 |
| SAB00135    |               | 1                 |              | Blood       | 105 | CC5 | NA         | Skin site                         | NA              | White | Female | 55-60 |
| SAB00138    |               | 1                 |              | Blood       | 105 | CC5 | NA         | Central venous catheter infection | NA              | Black | Female | 45-50 |
| S0132       |               | 1                 |              | SSTI        | 105 | CC5 | NA         | NA                                | Cellulitis      | White | Female | 55-60 |
| SAB00143    |               | 1                 |              | Blood       | 105 | CC5 | NA         | Urinary source                    | NA              | Black | Male   | 90-95 |
| SAB00010    |               | 4                 |              | Blood       | 8   | CC8 | USA300     | Unknown                           | NA              | Black | Female | 50-55 |
| S0089       |               | 4                 |              | SSTI        | 8   | CC8 | USA300     | NA                                | Infected Wounds | Other | Male   | 40-45 |
| SAB00081    |               | 6                 |              | Blood       | 8   | CC8 | USA300     | Central venous catheter infection | NA              | Other | Female | 30-35 |
| S0040       |               | 6                 |              | SSTI        | 8   | CC8 | USA300     | NA                                | Cellulitis      | White | Female | 85-90 |
| S0024       |               | 11                |              | SSTI        | 8   | CC8 | USA300     | NA                                | Abscess         | White | Female | 70-75 |
| SAB00048    |               | 11                |              | Blood       | 8   | CC8 | USA300     | Device infection                  | NA              | Black | Female | 60-65 |
| SAB00098    |               | 12                |              | Blood       | 8   | CC8 | USA300     | Central venous catheter infection | NA              | Black | Female | 80-85 |
| S0052       |               | 12                |              | SSTI        | 8   | CC8 | USA300     | NA                                | Abscess         | White | Male   | 40-45 |
| SAB00072    |               | 13                |              | Blood       | 8   | CC8 | USA300     | Unknown                           | NA              | White | Male   | 30-35 |
| S0094       |               | 13                |              | SSTI        | 8   | CC8 | USA300     | NA                                | Abscess         | White | Male   | 75-80 |
| S0056       |               | 15                |              | SSTI        | 8   | CC8 | USA300     | NA                                | Cellulitis      | White | Male   | 30-35 |
| SAB00121    |               | 15                |              | Blood       | 8   | CC8 | USA300     | Unknown                           | NA              | White | Male   | 30-35 |
| SAB00005    |               | 16                |              | Blood       | 8   | CC8 | USA300     | Unknown                           | NA              | White | Female | 70-75 |
| S0013       |               | 16                |              | SSTI        | 8   | CC8 | USA300     | NA                                | Abscess         | White | Female | 50-55 |
| SAB00008    | NA            |                   | 2            | Blood       | 105 | CC5 | NA         | Unknown                           | NA              | Black | Male   | 50-55 |
| SAB00031    | NA            |                   | 2            | Blood       | 105 | CC5 | NA         | Unknown                           | NA              | Black | Male   | 65-70 |
| SAB00082    | NA            |                   | 2            | Blood       | 105 | CC5 | NA         | Central venous catheter infection | NA              | Asian | Male   | 45-50 |
| SAB00065    | NA            |                   | 5            | Blood       | 8   | CC8 | USA300     | Unknown                           | NA              | Other | Female | 50-55 |
| SAB00126    | NA            |                   | 5            | Blood       | 8   | CC8 | USA300     | Surgical site                     | NA              | White | Male   | 65-70 |
| SAB00009    | NA            |                   | 9            | Blood       | 105 | CC5 | NA         | Central venous catheter infection | NA              | Black | Female | 50-55 |
| SAB00023    | NA            |                   | 9            | Blood       | 105 | CC5 | NA         | Unknown                           | NA              | Black | Male   | 25-30 |
| SAB00063    | NA            |                   | 10           | Blood       | 8   | CC8 | USA300     | Unknown                           | NA              | White | Female | 20-25 |
| SAB00075    | NA            |                   | 10           | Blood       | 8   | CC8 | USA300     | Unknown                           | NA              | Other | Female | 40-45 |
| SAB00047    | NA            |                   | 14           | Blood       | 105 | CC5 | NA         | Unknown                           | NA              | Black | Female | 60-65 |
| SAB00074    | NA            |                   | 14           | Blood       | 105 | CC5 | NA         | Central venous catheter infection | NA              | White | Male   | 45-50 |

397  
 398 \*Subject IDs presented in this table are coded to ensure the confidentiality of patient  
 399 information. These codes are known exclusively to the study team and have been designed to  
 400 safeguard participants' privacy.

401  
 402 **Figure Legends**

403  
 404 Figure 1. A) Distribution of infection types among the skin and soft tissue infections (SSTIs),  
 405 stratified by clonal complex. B) Distribution of infection types among the bloodstream

406 infections (BSIs), stratified by clonal complex. C) Clonal complex distribution comparing SSTI and  
407 BSI strains.

408

409 Figure 2. A) Maximum likelihood tree of all sequenced samples. Heatmap depicts clonal  
410 complexes, if the samples are from a bloodstream infection (BSI), and agr group. B) CC8 cluster  
411 only, C) CC5 cluster only, branch tips indicate outbreak clusters > 15 SNPs. Clusters with only BSI  
412 strains are represented with a circle, clusters with only strains from skin and soft tissue  
413 infections (SSTIs) are represented with a square, and clusters containing both BSI and SSTI  
414 strains are represented by triangles.

415 **Figures**

416 **Figure 1.**

417

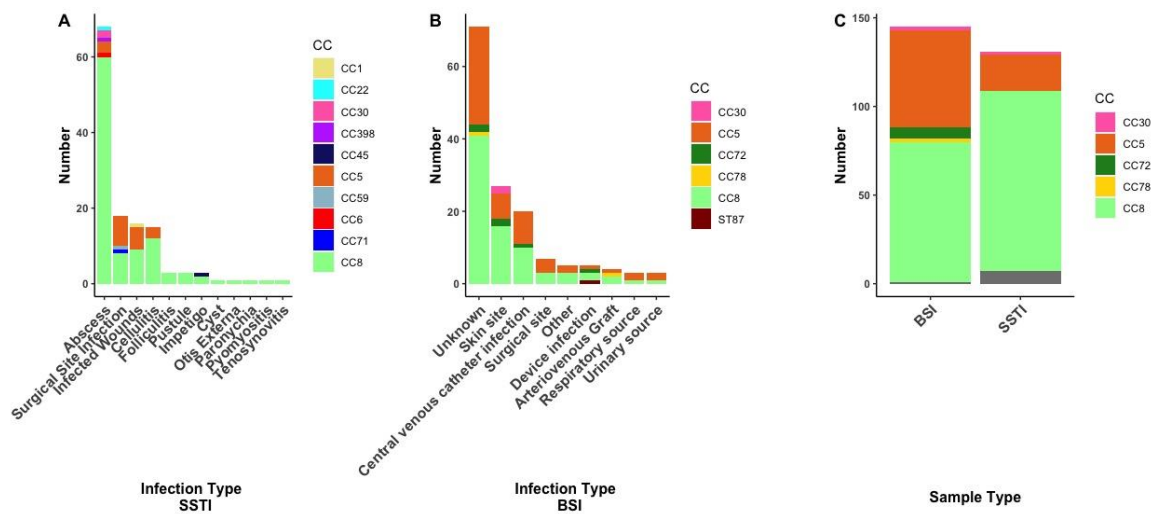

418

419

420 **Figure 2.**

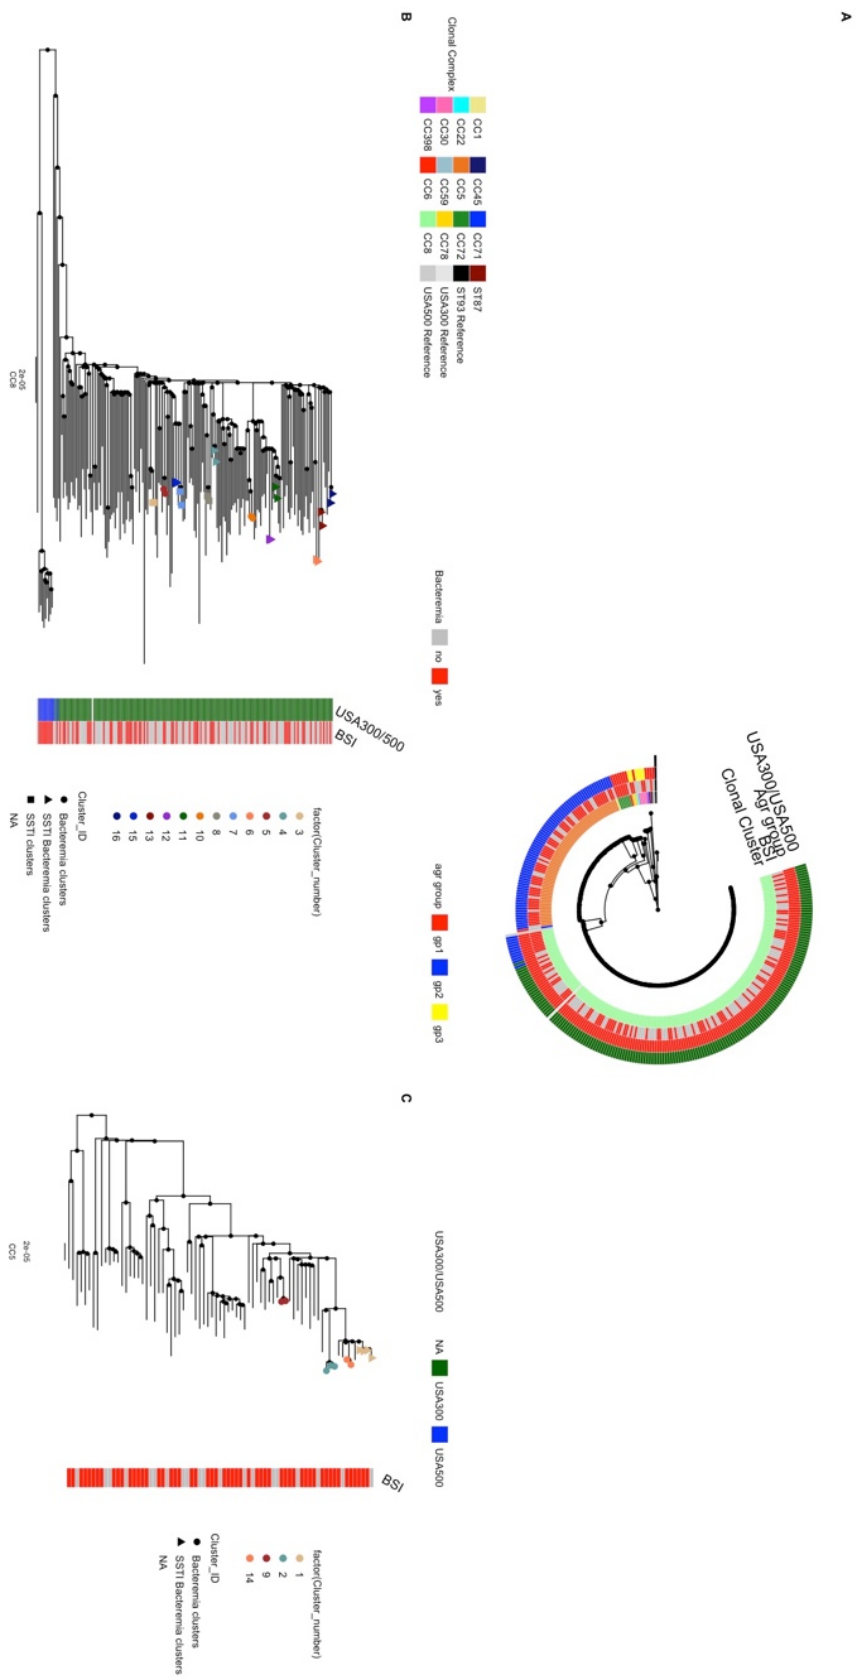

Source: https://medrxiv.org/content/10.1101/2023.12.02.23299293.full.pdf
